# Supplementary material for: Perceived Gap of Age-Friendliness among Community-Dwelling Older Adults: Findings from Malaysia, a Middle-Income Country
Source: MDPI journal article supplement (doi:10.3390/ijerph19127171), 2022-06-11
Supplement: s1 [file s1]

**Supplementary Table S1: Availability and importance of the elements in eight domains of an aged-friendly city in Ipoh city's perspectives**

|                              |                                                                                                                                     | Availability |      |     |      |          |      |       |      | Importance |     |      |          |      |       |
|------------------------------|-------------------------------------------------------------------------------------------------------------------------------------|--------------|------|-----|------|----------|------|-------|------|------------|-----|------|----------|------|-------|
|                              |                                                                                                                                     | Yes          |      | No  |      | Not sure |      | Total | Yes  |            | No  |      | Not sure |      | Total |
| Domain                       | Elements                                                                                                                            | n            | %    | n   | %    | n        | %    | n     | n    | %          | n   | %    | n        | %    | n     |
| Housing                      | Homes that are equipped with features such as a no-step entry, wider doorways, first floor bedroom and bath, grab bars in bathrooms | 559          | 52.7 | 284 | 26.8 | 217      | 20.5 | 1060  | 910  | 86.0       | 80  | 7.6  | 68       | 6.4  | 1058  |
|                              | Affordable housing options for senior people                                                                                        | 203          | 19.2 | 617 | 58.2 | 240      | 22.6 | 1060  | 804  | 75.9       | 154 | 14.5 | 101      | 9.5  | 1059  |
|                              | Financial assistance for home modification/purchasing                                                                               | 128          | 12.1 | 621 | 58.6 | 310      | 29.3 | 1059  | 737  | 69.8       | 195 | 18.5 | 124      | 11.7 | 1056  |
| Outdoor spaces and buildings | Accessibility of the following to older people:                                                                                     |              |      |     |      |          |      |       |      |            |     |      |          |      |       |
|                              | Park and recreational areas                                                                                                         | 801          | 75.6 | 127 | 12.0 | 131      | 12.4 | 1059  | 972  | 92.0       | 20  | 1.9  | 65       | 6.2  | 1057  |
|                              | Public building and facilities (e.g. hospital, post office, bank, offices, telephone booth, others)                                 | 930          | 87.8 | 85  | 8.0  | 44       | 4.2  | 1059  | 1008 | 95.4       | 14  | 1.3  | 35       | 3.3  | 1057  |
|                              | Public rest rooms accessible to older people of different physical abilities                                                        | 614          | 58.0 | 184 | 17.4 | 261      | 24.7 | 1059  | 939  | 88.9       | 20  | 1.9  | 97       | 9.2  | 1056  |
|                              | Well-maintained parks, public building and facilities                                                                               | 798          | 75.4 | 171 | 16.2 | 90       | 8.5  | 1059  | 1011 | 95.7       | 11  | 1.0  | 35       | 3.3  | 1057  |
|                              | Neighborhood watch programs (eg: <i>RELA</i> , <i>Rukun Tetangga</i> )                                                              | 542          | 51.2 | 413 | 39.0 | 104      | 9.8  | 1059  | 956  | 90.4       | 33  | 3.1  | 68       | 6.4  | 1057  |
| Transportation and streets   | Accessible and convenient public transportation                                                                                     | 452          | 42.8 | 365 | 34.5 | 240      | 22.7 | 1057  | 893  | 84.6       | 28  | 2.7  | 135      | 12.8 | 1056  |

|                     |                                                                                                                                    |     |      |     |      |     |      |      |      |      |     |      |     |      |      |
|---------------------|------------------------------------------------------------------------------------------------------------------------------------|-----|------|-----|------|-----|------|------|------|------|-----|------|-----|------|------|
| Health and wellness | Affordable public transportation                                                                                                   | 442 | 41.7 | 104 | 9.8  | 513 | 48.4 | 1059 | 891  | 84.3 | 20  | 1.9  | 146 | 13.8 | 1057 |
|                     | Public transport provides access to destinations like hospital, clinics, parks, shopping centers, banks and other key destination. | 461 | 43.5 | 102 | 9.6  | 496 | 46.8 | 1059 | 903  | 85.4 | 18  | 1.7  | 136 | 12.9 | 1057 |
|                     | Easy to read traffic signs (e.g. appropriate size, color and font)                                                                 | 846 | 79.9 | 86  | 8.1  | 127 | 12.0 | 1059 | 993  | 93.9 | 9   | 0.9  | 56  | 5.3  | 1058 |
|                     | Priority parking bays for elderly                                                                                                  | 130 | 12.3 | 775 | 73.2 | 154 | 14.5 | 1059 | 954  | 90.2 | 32  | 3.0  | 72  | 6.8  | 1058 |
|                     | Audio / visual pedestrian crossings                                                                                                | 408 | 38.5 | 463 | 43.7 | 188 | 17.8 | 1059 | 967  | 91.5 | 15  | 1.4  | 75  | 7.1  | 1057 |
|                     | Health and wellness programs and classes in areas such as nutrition, smoking cessation, and weight control                         | 369 | 34.8 | 381 | 36.0 | 309 | 29.2 | 1059 | 865  | 81.8 | 63  | 6.0  | 130 | 12.3 | 1058 |
|                     | Conveniently located health facilities                                                                                             | 971 | 91.7 | 67  | 6.3  | 21  | 2.0  | 1059 | 1040 | 98.2 | 4   | 0.4  | 15  | 1.4  | 1059 |
|                     | Home visit services by healthcare professionals for senior patients                                                                | 179 | 16.9 | 637 | 60.2 | 243 | 23.0 | 1059 | 951  | 89.9 | 27  | 2.6  | 80  | 7.6  | 1058 |
|                     | Nursing home for older people                                                                                                      | 698 | 65.9 | 250 | 23.6 | 111 | 10.5 | 1059 | 859  | 81.2 | 112 | 10.6 | 87  | 8.2  | 1058 |
|                     | A variety of health care professionals including specialists                                                                       | 710 | 67.0 | 171 | 16.2 | 178 | 16.8 | 1059 | 1026 | 96.8 | 5   | 0.5  | 29  | 2.7  | 1060 |
|                     | Health care professionals who speak different languages                                                                            | 818 | 77.2 | 135 | 12.8 | 106 | 10.0 | 1059 | 1011 | 95.5 | 23  | 2.2  | 25  | 2.4  | 1059 |
|                     | Respectful and helpful hospital and clinic staff                                                                                   | 988 | 93.3 | 28  | 2.6  | 43  | 4.1  | 1059 | 1035 | 98.1 | 3   | 0.3  | 17  | 1.6  | 1055 |

|                                                                    |                                                                                                                                               |     |      |     |      |     |      |      |     |      |     |      |     |      |      |
|--------------------------------------------------------------------|-----------------------------------------------------------------------------------------------------------------------------------------------|-----|------|-----|------|-----|------|------|-----|------|-----|------|-----|------|------|
| <b>Social participation, inclusion and education opportunities</b> | Privilege for senior citizens for entertainment (e.g. discount, special program, no queue, etc.)                                              | 298 | 28.2 | 406 | 38.4 | 354 | 33.5 | 1058 | 596 | 56.4 | 306 | 29.0 | 154 | 14.6 | 1056 |
|                                                                    | Conveniently located venues for entertainment                                                                                                 | 352 | 33.3 | 297 | 28.1 | 409 | 38.7 | 1058 | 449 | 42.5 | 414 | 39.2 | 194 | 18.4 | 1057 |
|                                                                    | A variety of cultural celebration (festivals, spiritual events, etc.) involving older adults in the multiracial populations                   | 547 | 51.8 | 364 | 34.5 | 145 | 13.7 | 1056 | 811 | 76.8 | 147 | 13.9 | 98  | 9.3  | 1056 |
|                                                                    | Social clubs for books, gardening, crafts or hobbies                                                                                          | 279 | 26.4 | 506 | 47.9 | 272 | 25.7 | 1057 | 501 | 47.3 | 376 | 35.5 | 182 | 17.2 | 1059 |
| <b>Volunteering and civic engagement</b>                           | A range of volunteer activities to choose from for elderly                                                                                    | 275 | 25.9 | 531 | 50.1 | 254 | 24.0 | 1060 | 492 | 46.5 | 408 | 38.5 | 159 | 15.0 | 1059 |
|                                                                    | Opportunities for older adults to participate in decision making bodies such as community councils or committees (e.g. giving expert opinion) | 351 | 33.2 | 459 | 43.4 | 248 | 23.4 | 1058 | 529 | 50.1 | 377 | 35.7 | 151 | 14.3 | 1057 |
| <b>Job opportunities</b>                                           | A range of flexible job opportunities for older adults (e.g. part-time)                                                                       | 214 | 20.2 | 647 | 61.1 | 198 | 18.7 | 1059 | 579 | 54.7 | 389 | 36.7 | 91  | 8.6  | 1059 |
| <b>Community and information</b>                                   | Official, written information (e.g.: forms, brochures) adapted to the needs of seniors (e.g. Large font size)                                 | 699 | 65.9 | 246 | 23.2 | 115 | 10.9 | 1060 | 951 | 89.8 | 36  | 3.4  | 72  | 6.8  | 1059 |
|                                                                    | Telephone operator services adapted to the needs of seniors (e.g.: instructions are given slowly)                                             | 621 | 58.5 | 166 | 15.7 | 274 | 25.8 | 1061 | 893 | 84.4 | 26  | 2.5  | 139 | 13.1 | 1058 |
|                                                                    | Free access to computers and the Internet in public places such as the library, centers or government buildings                               | 210 | 19.8 | 422 | 39.9 | 427 | 40.3 | 1059 | 646 | 61.2 | 213 | 20.2 | 197 | 18.7 | 1056 |
|                                                                    | Information (e.g. flyers, maps, others) that is available in a number of different languages                                                  | 550 | 51.8 | 371 | 35.0 | 140 | 13.2 | 1061 | 893 | 85.1 | 72  | 6.9  | 84  | 8.0  | 1049 |

**Supplementary Table S2: Gap score analysis of the elements in eight domains of an aged-friendly city in Ipoh city's perspectives**

| Domain                              | Elements                                                                                                                            | Valid n <sup>a</sup> | Score 0: No perceived gap |      | Score 1: Perceived gap |      | Score 2: Perceived gap |      | Mean Percent |      |
|-------------------------------------|-------------------------------------------------------------------------------------------------------------------------------------|----------------------|---------------------------|------|------------------------|------|------------------------|------|--------------|------|
|                                     |                                                                                                                                     |                      | n                         | %    | n                      | %    | n                      | %    |              |      |
| <b>Housing</b>                      | Homes that are equipped with features such as a no-step entry, wider doorways, first floor bedroom and bath, grab bars in bathrooms | 990                  | 630                       | 63.6 | 117                    | 11.8 | 243                    | 24.5 | 36.4         | 55.4 |
|                                     | Affordable housing options for senior people                                                                                        | 958                  | 349                       | 36.4 | 125                    | 13.0 | 484                    | 50.5 | 63.6         |      |
|                                     | Financial assistance for home modification/ purchasing                                                                              | 932                  | 314                       | 33.7 | 157                    | 16.8 | 461                    | 49.5 | 66.3         |      |
| <b>Outdoor spaces and buildings</b> | Accessibility of the following to older people:                                                                                     | 992                  | 811                       | 81.8 | 68                     | 6.9  | 113                    | 11.4 | 18.2         | 25.5 |
|                                     | Park and recreational areas                                                                                                         | 1022                 | 929                       | 90.9 | 15                     | 1.5  | 78                     | 7.6  | 9.1          |      |
|                                     | Public building and facilities (e.g. hospital, post office, bank, offices, telephone booth, others)                                 | 963                  | 625                       | 64.9 | 168                    | 17.4 | 170                    | 17.7 | 35.1         |      |
|                                     | Public rest rooms accessible to older people of different physical abilities                                                        | 1022                 | 800                       | 78.3 | 55                     | 5.4  | 167                    | 16.3 | 21.7         |      |
|                                     | Well-maintained parks, public building and facilities                                                                               | 989                  | 561                       | 56.7 | 53                     | 5.4  | 375                    | 37.9 | 43.3         |      |
| <b>Transportation and streets</b>   | Accessible and convenient public transportation                                                                                     | 919                  | 471                       | 51.3 | 108                    | 11.8 | 340                    | 37.0 | 48.7         | 50.7 |
|                                     | Affordable public transportation                                                                                                    | 911                  | 456                       | 50.1 | 360                    | 39.5 | 95                     | 10.4 | 49.9         |      |
|                                     | Public transport provides access to destinations like hospital, clinics, parks, shopping centers, banks and other key destination.  | 921                  | 470                       | 51.0 | 357                    | 38.8 | 94                     | 10.2 | 49.0         |      |
|                                     | Easy to read traffic signs (e.g. appropriate size, color and font)                                                                  | 1001                 | 843                       | 84.2 | 76                     | 7.6  | 82                     | 8.2  | 15.8         |      |
|                                     | Priority parking bays for elderly                                                                                                   | 986                  | 160                       | 16.2 | 85                     | 8.6  | 741                    | 75.2 | 83.8         |      |

|                                                                    |                                                                                                                                               |      |     |      |     |      |     |      |      |      |
|--------------------------------------------------------------------|-----------------------------------------------------------------------------------------------------------------------------------------------|------|-----|------|-----|------|-----|------|------|------|
|                                                                    | Audio / visual pedestrian crossings                                                                                                           | 982  | 421 | 42.9 | 118 | 12.0 | 443 | 45.1 | 57.1 |      |
| <b>Health and wellness</b>                                         | Health and wellness programs and classes in areas such as nutrition, smoking cessation, and weight control                                    | 927  | 419 | 45.2 | 166 | 17.9 | 342 | 36.9 | 54.8 | 31.3 |
|                                                                    | Conveniently located health facilities                                                                                                        | 1044 | 968 | 92.7 | 14  | 1.3  | 62  | 5.9  | 7.3  |      |
|                                                                    | Home visit services by healthcare professionals for senior patients                                                                           | 978  | 206 | 21.1 | 168 | 17.2 | 604 | 61.8 | 78.9 |      |
|                                                                    | Nursing home for older people                                                                                                                 | 971  | 754 | 77.7 | 53  | 5.5  | 164 | 16.9 | 22.3 |      |
|                                                                    | A variety of health care professionals including specialists                                                                                  | 1030 | 712 | 69.1 | 156 | 15.1 | 162 | 15.7 | 30.9 |      |
|                                                                    | Health care professionals who speak different languages                                                                                       | 1033 | 837 | 81.0 | 80  | 7.7  | 116 | 11.2 | 19.0 |      |
|                                                                    | Respectful and helpful hospital and clinic staff                                                                                              | 1039 | 980 | 94.3 | 31  | 3.0  | 28  | 2.7  | 5.7  |      |
| <b>Social participation, inclusion and education opportunities</b> | Privilege for senior citizens for entertainment (e.g. discount, special program, no queue, etc.)                                              | 902  | 588 | 65.2 | 91  | 10.1 | 223 | 24.7 | 34.8 | 27.9 |
|                                                                    | Conveniently located venues for entertainment                                                                                                 | 862  | 703 | 81.6 | 62  | 7.2  | 97  | 11.3 | 18.4 |      |
|                                                                    | A variety of cultural celebration (festivals, spiritual events, etc.) involving older adults in the multiracial populations                   | 955  | 670 | 70.2 | 29  | 3.0  | 256 | 26.8 | 29.8 |      |
|                                                                    | Social clubs for books, gardening, crafts or hobbies                                                                                          | 872  | 625 | 71.7 | 62  | 7.1  | 185 | 21.2 | 28.3 |      |
| <b>Volunteering and civic engagement</b>                           | A range of volunteer activities to choose from for elderly                                                                                    | 900  | 665 | 73.9 | 66  | 7.3  | 169 | 18.8 | 26.1 | 23.7 |
|                                                                    | Opportunities for older adults to participate in decision making bodies such as community councils or committees (e.g. giving expert opinion) | 905  | 712 | 78.7 | 57  | 6.3  | 136 | 15.0 | 21.3 |      |
| <b>Job opportunities</b>                                           | A range of flexible job opportunities for older adults (e.g. part-time)                                                                       | 968  | 573 | 59.2 | 64  | 6.6  | 331 | 34.2 | 40.8 | 40.8 |
| <b>Communication &amp; information</b>                             | Official, written information (e.g.: forms, brochures) adapted to the needs of seniors (e.g. Large font size)                                 | 987  | 714 | 72.3 | 56  | 5.7  | 217 | 22.0 | 27.7 | 37.2 |

|                                                                                                                 |     |     |      |     |      |     |      |      |
|-----------------------------------------------------------------------------------------------------------------|-----|-----|------|-----|------|-----|------|------|
| Telephone operator services adapted to the needs of seniors (e.g.: instructions are given slowly)               | 919 | 639 | 69.5 | 136 | 14.8 | 144 | 15.7 | 30.5 |
| Free access to computers and the Internet in public places such as the library, centers or government buildings | 861 | 410 | 47.6 | 159 | 18.5 | 292 | 33.9 | 52.4 |
| Information (e.g. flyers, maps, others) that is available in a number of different languages                    | 963 | 595 | 61.8 | 60  | 6.2  | 308 | 32.0 | 38.2 |

**Supplementary Table S3: Univariate binary logistic regressions assessing demographic characteristics associated with presence of perceived gap on the eight age-friendly domains**

|                 |                     |                     |                      |                      |                     |                     |                     |                      |
|-----------------|---------------------|---------------------|----------------------|----------------------|---------------------|---------------------|---------------------|----------------------|
| Non-city centre | 0.870 (0.657-1.154) | 0.785 (0.610-1.011) | 0.977 (0.660-1.445)  | 1.405 (0.998-1.977)  | 1.372 (1.065-1.768) | 0.684 (0.520-0.901) | 0.962 (0.745-1.244) | 0.869 (0.664-1.138)  |
| Marital status  |                     |                     |                      |                      |                     |                     |                     |                      |
| Married         |                     |                     |                      |                      |                     |                     |                     |                      |
| Unmarried       | 0.919 (0.635-1.330) | 0.809 (0.585-1.119) | 0.634 (0.398-1.010)  | 0.988 (0.634-1.539)  | 1.054 (0.754-1.472) | 0.835 (0.572-1.220) | 1.113 (0.796-1.555) | 1.593 (1.085-2.340)  |
| Ethnicity       |                     |                     |                      |                      |                     |                     |                     |                      |
| Malay           |                     |                     |                      |                      |                     |                     |                     |                      |
| Chinese         | 0.980 (0.679-1.415) | 1.406 (1.009-1.957) | 1.487 (0.887-2.492)  | 1.239 (0.795-1.931)  | 1.208 (0.867-1.682) | 1.268 (0.897-1.792) | 1.161 (0.831-1.623) | 1.071 (0.758-1.514)  |
| Indian          | 0.956 (0.689-1.327) | 1.335 (0.998-1.788) | 1.421 (0.906-2.227)  | 1.183 (0.802-1.744)  | 1.062 (0.793-1.424) | 0.736 (0.531-1.020) | 1.007 (0.747-1.358) | 1.292 (0.944-1.768)  |
| Others          | 2.075 (0.456-9.447) | 1.381 (0.463-4.120) | 2.117 (0.272-16.461) | 2.800 (0.362-21.679) | 1.242 (0.408-3.782) | 0.840 (0.258-2.736) | 1.079 (0.336-3.468) | 3.104 (0.689-13.980) |
| Education       |                     |                     |                      |                      |                     |                     |                     |                      |
| None            |                     |                     |                      |                      |                     |                     |                     |                      |
| Primary         | 1.371 (0.726-2.587) | 0.981 (0.534-1.800) | 0.612 (0.180-2.074)  | 1.011 (0.430-2.374)  | 0.748 (0.395-1.417) | 2.549 (1.102-5.895) | 1.120 (0.579-2.166) | 0.768 (0.374-1.577)  |
| Secondary       | 1.502 (0.807-2.798) | 1.086 (0.598-1.970) | 0.495 (0.149-1.642)  | 0.863 (0.375-1.984)  | 0.784 (0.419-1.466) | 2.588 (1.133-5.911) | 1.431 (0.750-2.730) | 0.719 (0.355-1.456)  |
| Tertiary        | 2.501 (1.200-5.216) | 1.089 (0.558-2.123) | 0.576 (0.158-2.100)  | 0.775 (0.310-1.934)  | 0.774 (0.387-1.546) | 3.516 (1.459-8.476) | 2.233 (1.097-4.547) | 0.915 (0.419-1.999)  |
| Living status   |                     |                     |                      |                      |                     |                     |                     |                      |
| Alone           |                     |                     |                      |                      |                     |                     |                     |                      |

|                             |                      |                     |                     |                     |                     |                     |                      |                     |
|-----------------------------|----------------------|---------------------|---------------------|---------------------|---------------------|---------------------|----------------------|---------------------|
| <b>Not alone</b>            | 0.812 (0.449-1.468)  | 1.233 (0.755-2.015) | 1.060 (0.494-2.274) | 0.812 (0.395-1.668) | 0.970 (0.594-1.583) | 0.965 (0.571-1.633) | 0.692 (0.421-1.138)  | 0.779 (0.442-1.372) |
| <b>Income</b>               |                      |                     |                     |                     |                     |                     |                      |                     |
| <b>Less than RM 2000</b>    |                      |                     |                     |                     |                     |                     |                      |                     |
| <b>RM2000-4800</b>          | 1.216 (0.745-1.984)  | 0.754 (0.495-1.149) | 1.106 (0.557-2.195) | 0.839 (0.482-1.458) | 0.966 (0.636-1.465) | 0.952 (0.593-1.527) | 12.117 (1.370-3.270) | 0.818 (0.525-1.276) |
| <b>More than RM4800</b>     | 4.968 (1.172-21.053) | 1.235 (0.556-2.743) | 1.658 (0.389-7.079) | 1.087 (0.372-3.171) | 3.497 (1.322-9.245) | 2.256 (1.060-4.800) | 4.653 (1.946-11.126) | 2.637 (0.909-7.652) |
| <b>Duration of stay</b>     |                      |                     |                     |                     |                     |                     |                      |                     |
| <b>6 months-10 years</b>    |                      |                     |                     |                     |                     |                     |                      |                     |
| <b>11-30 years</b>          | 1.299 (0.587-2.874)  | 1.500 (0.785-2.866) | 1.912 (0.788-4.638) | 2.984 (1.351-6.593) | 0.992 (0.520-1.893) | 0.765 (0.377-1.553) | 0.873 (0.449-1.697)  | 0.672 (0.319-1.417) |
| <b>31-60 years</b>          | 1.024 (0.478-2.195)  | 1.558 (0.830-2.924) | 1.564 (0.675-3.623) | 1.430 (0.698-2.929) | 1.129 (0.602-2.116) | 0.754 (0.378-1.504) | 1.045 (0.549-1.992)  | 0.773 (0.373-1.604) |
| <b>More than 60 years</b>   | 0.762 (0.364-1.595)  | 1.954 (1.058-3.609) | 2.348 (1.026-5.375) | 2.367 (1.166-4.805) | 1.452 (0.787-2.680) | 0.479 (0.243-0.942) | 0.627 (0.334-1.176)  | 0.900 (0.441-1.836) |
| <b>Health condition</b>     |                      |                     |                     |                     |                     |                     |                      |                     |
| <b>Healthy</b>              |                      |                     |                     |                     |                     |                     |                      |                     |
| <b>Active with diseases</b> | 1.053 (0.740-1.500)  | 0.879 (0.642-1.203) | 1.222 (0.769-1.944) | 0.826 (0.534-1.278) | 0.756 (0.555-1.030) | 0.921 (0.661-1.285) | 0.789 (0.573-1.084)  | 0.874 (0.623-1.227) |



|                                      |                     |                     |                     |                     |                     |                     |                     |                     |
|--------------------------------------|---------------------|---------------------|---------------------|---------------------|---------------------|---------------------|---------------------|---------------------|
| <b>Inactive</b>                      | 0.448 (0.234-0.859) | 0.913 (0.481-1.734) | 2.154 (0.626-7.417) | 0.701 (0.309-1.590) | 0.419 (0.226-0.778) | 0.427 (0.180-1.017) | 0.657 (0.335-1.287) | 0.916 (0.438-1.915) |
| <b>Possess health care insurance</b> |                     |                     |                     |                     |                     |                     |                     |                     |
| <b>Yes</b>                           |                     |                     |                     |                     |                     |                     |                     |                     |
| <b>No</b>                            | 0.758 (0.565-1.018) | 0.897 (0.691-1.164) | 0.814 (0.539-1.231) | 0.756 (0.528-1.084) | 0.789 (0.607-1.024) | 0.963 (0.729-1.274) | 0.828 (0.637-1.078) | 0.969 (0.734-1.278) |
| <b>Physical exercise</b>             |                     |                     |                     |                     |                     |                     |                     |                     |
| <b>Never</b>                         |                     |                     |                     |                     |                     |                     |                     |                     |
| <b>1-4 times per week</b>            | 1.099 (0.760-1.591) | 1.056 (0.748-1.489) | 1.192 (0.706-2.011) | 1.033 (0.652-1.636) | 1.281 (0.907-1.810) | 1.226 (0.832-1.808) | 0.950 (0.670-1.347) | 0.914 (0.633-1.319) |
| <b>5-7 times per week</b>            | 1.754 (1.166-2.638) | 1.222 (0.849-1.760) | 1.149 (0.663-1.993) | 1.100 (0.676-1.793) | 1.226 (0.851-1.768) | 1.322 (0.880-1.986) | 0.797 (0.550-1.156) | 1.288 (0.866-1.914) |
| <b>Internet access</b>               |                     |                     |                     |                     |                     |                     |                     |                     |
| <b>No</b>                            |                     |                     |                     |                     |                     |                     |                     |                     |
| <b>Yes</b>                           | 1.733 (1.301-2.307) | 1.085 (0.843-1.395) | 1.305 (0.879-1.937) | 1.344 (0.956-1.891) | 1.344 (1.044-1.732) | 1.781 (1.348-2.353) | 1.739 (1.342-2.253) | 1.323 (1.010-1.734) |
| <b>Employment status</b>             |                     |                     |                     |                     |                     |                     |                     |                     |
| <b>Employed</b>                      |                     |                     |                     |                     |                     |                     |                     |                     |
| <b>Unemployed</b>                    | 0.999 (0.694-1.437) | 1.048 (0.759-1.448) | 1.393 (0.871-2.228) | 1.307 (0.865-1.975) | 0.911 (0.656-1.266) | 0.752 (0.534-1.057) | 0.605 (0.438-0.834) | 1.152 (0.819-1.621) |

**Intention to  
continue  
working**

| Yes |                         |                         |                         |                         |                         |                         |                         |                         |
|-----|-------------------------|-------------------------|-------------------------|-------------------------|-------------------------|-------------------------|-------------------------|-------------------------|
| No  | 0.874 (0.618-<br>1.236) | 1.035 (0.763-<br>1.403) | 1.184 (0.747-<br>1.876) | 1.208 (0.813-<br>1.794) | 0.932 (0.685-<br>1.270) | 0.610 (0.444-<br>0.838) | 0.461 (0.340-<br>0.626) | 1.042 (0.753-<br>1.442) |

---

*CI, confidence interval; OR, odd ratio.*

## QUESTIONNAIRE

ZONE: \_\_\_\_\_ LOCATION: \_\_\_\_\_ DATA COLLECTOR (CODE) : \_\_\_\_\_  
Subject ID: \_\_\_\_\_ Gender: F ☐ M ☐

---

## ABOUT YOU

1. What is your date of birth (DD/MM/YYYY)?   /   /

2. What is your current marital status?

- |                                            |                                                |
|--------------------------------------------|------------------------------------------------|
| <input type="radio"/> Married              | <input type="radio"/> Widowed                  |
| <input type="radio"/> Divorced / separated | <input type="radio"/> Bachelor / never married |

3. What is your ethnicity?

- |                               |                                                     |
|-------------------------------|-----------------------------------------------------|
| <input type="radio"/> Malay   | <input type="radio"/> Indian                        |
| <input type="radio"/> Chinese | <input type="radio"/> Others, please specify: _____ |

4. Besides yourself, do you have any of the following people living in your household currently?

- |                                                                          |                                                     |
|--------------------------------------------------------------------------|-----------------------------------------------------|
| <input type="radio"/> None                                               | <input type="radio"/> Other relatives               |
| <input type="radio"/> Spouse only                                        | <input type="radio"/> Your friend                   |
| <input type="radio"/> Family members (spouse / children / grandchildren) | <input type="radio"/> Others, please specify: _____ |

5. What is your highest education (no education / primary / secondary / tertiary / religious education /etc.?)

---

---

#### **BASELINE INFORMATION ON THE 8 DOMAINS FOR AGE-FRIENDLY CITY IN IPOH**

**6. How would you rate Ipoh as a place for senior citizens (age > 60 years) to live?**

- ☐ Good                      ☐ Moderate                      ☐ Poor

**7. Are you a local resident in Ipoh?**

☐ Yes                      Please specify long have you lived in Ipoh: \_\_\_\_\_ (years) \_\_\_\_\_ (months)

☐ No

**8. How important is it for you to remain staying in Ipoh?**

- ☐ Important                      ☐ Not important                      ☐ Not sure

**9. How important is it for you to be able to live independently in your own home as you age?**

- ☐ Important                      ☐ Not important                      ☐ Not sure

**10. Do you think you will need to make the following types of modifications or improvements to your home to enable you to stay there as you age?**

|                                                                                                    | Yes                   | No                    | Not sure              | Not relevant          |
|----------------------------------------------------------------------------------------------------|-----------------------|-----------------------|-----------------------|-----------------------|
| a. Easier access into or within your home such as a ramp, chairlift or elevator, or wider doorways | <input type="radio"/> | <input type="radio"/> | <input type="radio"/> | <input type="radio"/> |
| b. Bathroom modifications such as grab bars, handrails, a higher toilet or non-slip tiles          | <input type="radio"/> | <input type="radio"/> | <input type="radio"/> | <input type="radio"/> |
| c. Putting a bedroom, bathroom and kitchen on the first floor                                      | <input type="radio"/> | <input type="radio"/> | <input type="radio"/> | <input type="radio"/> |

d. Other, please specify: \_\_\_\_\_

**11. In the last 4 weeks (i.e. 1 month), how many times have you visited recreational parks in Ipoh?**

\_\_\_\_\_ (times) in last 1 month

**12. Please indicate 3 main transportation modes for you to get around on a regular basis for things like shopping, visiting doctors or going to other places.**

1. \_\_\_\_\_ 2. \_\_\_\_\_ 3. \_\_\_\_\_

**13. In general, how would you rate your health?**

- ☐ Healthy ☐ Inactive / with restricted mobility
- ☐ Active but with underlying diseases (DM, HPT, others) ☐ Hospitalised / bed-ridden

**14. Do you have any kinds of health care coverage (insurance / government pensioner / military healthcare / others)?**

☐ Yes, please specify: \_\_\_\_\_ ☐ No ☐ Not sure

**15. How often do you engage in some form of physical exercise (such as walking, jogging, biking, swimming, yoga / stretching / *tai ci*, others) in a week?**

☐ Frequently (5-7times) ☐ Seldom (1-4 times) ☐ Never

**16. In general, do you go online to access the Internet?**

☐ Yes, please specify the purpose: \_\_\_\_\_ ☐ No ☐ Not familiar with smart devices or computers

**17. How do you interact with your friends, family or neighbors in your community? (example: via phone, email, face-to-face, social media, etc.)**

\_\_\_\_\_

☐ Yes, please specify: ☐ No ☐ Not sure

☐ Self-employed (including babysitting grandchildren)
 ☐ Retired / pensioner

☐ Employed
 ☐ Unemployed

|                                                                                                 |                                                                                         |                                                  |
|-------------------------------------------------------------------------------------------------|-----------------------------------------------------------------------------------------|--------------------------------------------------|
| <input type="checkbox"/> Own salary (still working)                                             | <input type="checkbox"/> Pension                                                        | <input type="checkbox"/> None                    |
| <input type="checkbox"/> Welfare / other government or non-profit organization, please specify: | <input type="checkbox"/> Family members (spouse / children / grandchildren / relatives) | <input type="checkbox"/> Others, please specify: |

**22. Do you wish to continue to work for as long as possible?**

☐ Yes      ☐ No      ☐ Not sure

[illegible]

[illegible]

[illegible]



| (Based on IPOH city) |                                                                                                                                              | Availability          |                       |                       | Importance            |                       |                       |
|----------------------|----------------------------------------------------------------------------------------------------------------------------------------------|-----------------------|-----------------------|-----------------------|-----------------------|-----------------------|-----------------------|
|                      |                                                                                                                                              | Yes                   | No                    | Not sure              | Important             | Not important         | Not sure              |
| V25                  | Opportunities for older adults to participate in decision making bodies such as community councils or committees (eg. giving expert opinion) | <input type="radio"/> |
| J26                  | A range of flexible job opportunities for older adults (eg. part-time)                                                                       | <input type="radio"/> |
| C27                  | Official, written information (e.g.: forms, brochures) adapted to the needs of seniors (e.g.: large font size)                               | <input type="radio"/> |
| C28                  | Telephone operator services adapted to the needs of seniors (e.g.: instructions are given slowly)                                            | <input type="radio"/> |
| C29                  | Free access to computers and the Internet in public places such as the library, centers or government buildings                              | <input type="radio"/> |
| C30                  | Information (eg. flyers, maps, others) that is available in a number of different languages                                                  | <input type="radio"/> |

**24. Overall, do you think Ipoh is an age-friendly city?**

☐ Yes ☐ No ☐ Not sure

**25. Can the study team contact you for further information if required in future on the Age-friendly city concept in Ipoh?**

☐ Yes (proceed with the Informed Consent for contact details) ☐ No

The research team would like to express sincere gratitude for your time and effort in contributing for this study.

Thank you.
